# Supplementary material for: An induced pluripotent stem cell model of Schwann cell differentiation reveals NF2- related gene regulatory networks
Source: Research Square preprint supplement (doi:10.21203/rs.3.rs-6775534/v1), 2025-06-16
Supplement: Supplementary file 1 [file b988f2ce4b04b26866bcbe41.docx]

**SUPPLEMENTARY MATERIALS: An induced pluripotent stem cell model of Schwann cell differentiation reveals NF2-related gene regulatory networks**

Olivia Lazaro1,#, Sihong Li1,2,#, William Carter1, Jake Smiley1, Oluwamayowa Awosika1, Sylvia Robertson1, Angela Haskell1, Raven Hinkel1, Brooke E. Hickey3, Steven P. Angus3,4,5, Austin House1, D. Wade Clapp3,4,7, Abdul Q. Syed1,#, Travis S. Johnson1,3,4,6,*, Steven D. Rhodes3,4,7,8,*

1Indiana Bioscience Research Institute

2Indiana University School of Public Health

3Departmaent of Pediatrics, Herman B Wells Center for Pediatric Research, Indiana University School of Medicine, Indianapolis, IN, USA

4Melvin and Bren Simon Comprehensive Cancer Center, Indiana University School of Medicine, Indianapolis, IN USA

5Department of Pharmacology and Toxicology, Indiana University School of Medicine, Indianapolis, IN, USA

6Center for Computational Biology and Bioinformatics

7Department of Medical and Molecular Genetics, Indiana University School of Medicine, Indianapolis, IN, USA

8Division of Pediatric Hematology/Oncology/Stem Cell Transplant, Indiana University School of Medicine, Indianapolis, IN, USA

#These authors contributed equally to the work

***Corresponding authors:** Abdul Q. Syed (asyed@indianabiosciences.org), Travis S. Johnson (tjohnson@indianabiosciences.org), Steven D. Rhodes (sdrhodes@iu.edu)

**SUPPLEMENTAL TABLES**

**Table S1** Significant up and down regulated DEGs identified from SC-IU and SNAT datasets.

| **Gene set** | **Genes** |
| --- | --- |
| Significantly up-regulated DEGs in all six comparisons for SC-IU dataset | *ACTA2, ANKRD1, ANXA1, CDH6, FILIP1L, GREM1, HAND1, LRRN3, LUM, MEIS2, NPPB, NPR3, NR2F1, NR2F2, SNAI2, TNFRSF19, WNT2B, ZEB2* |
| Significantly down-regulated DEGs at each timepoint comparison for SC-IU dataset | *AC003975.1, AC004543.1, AC007001.1, AC009446.1, AC022140.1, AC022140.2, AC073071.1, AC097520.1, AC104257.1, AC104758.3, AC108515.1, AC148477.4, AL117378.1, AL117378.2, AL157817.1, AL354821.1, AL354994.1, AL392023.1, AL591030.1, AP000943.2, B3GNT7, C10orf142, CR2, CTCFL, D21S2088E, DPEP3, EMX1, GFY, GLB1L3, GOLGA6A, GOLGA6C, GOLGA6D, GUCY2C, HCG24, HMX2, HRC, LCK, LINC00599, LINC00678, LINC01194, LNCPRESS2, MACC1-AS1, MAT1A, OLIG1, SLC35D3, TDGF1, TNFSF11, TRDN, UCMA, VWC2* |
| Significantly up-regulated DEGs at each timepoint comparison for SNAT dataset | *ADAMTS20, ART3, ASPA, BCAS1, C1S, CASP12, CCL11, CDH19, CLDN19, COL5A3, CRYAB, CTNNA3, CYP2J2, DEPDC7, DMD, EFHD1, EGR2, EMP2, ENTPD2, FABP4, GAL3ST1, GAS2L3, GATM, GJC3, IGFBP6, ITGB4, ITIH5, MAL, MBP, MLIP, NIPAL1, PLLP, PLP1, PLXDC1, PPP1R1B, PREX2, PRRG4, PRX, RARRES2, REM1, S100A3, S100A4, S100A6, SBSPON, SCN7A, THBS4, UGT8* |
| Significantly up-regulate DEGs in both SC-IU, SNAT, and contained in the blue module | *CCDC3, CDKN2B, COL8A1, CAV1, CAV2, KRT80, LOX, MFAP5, NNMT, NT5E, COL1A1, AHNAK, IGFBP7, LIMS2, MGLL, PALMD, SRGN, BHLHE40, FGF1, FNDC1, FOXS1* |

**Table S2** All significant marker DEGs for the clusters identified from the SC-SUMC dataset.

| **Gene** | **Cluster** | **Proportion cluster > 0** | **Proportion**  **other clusters >0** | **Log2FC** | **P** | **FDR** |
| --- | --- | --- | --- | --- | --- | --- |
| *FTL* | 2 | 0.99 | 0.93 | 0.68 | 1.2E-58 | 1.4E-54 |
| *FTH1* | 2 | 1.00 | 0.98 | 0.60 | 7.2E-42 | 8.3E-38 |
| *CXCL1* | 3 | 0.96 | 0.79 | 1.15 | 1.5E-144 | 1.7E-140 |
| *TIMP1* | 3 | 0.89 | 0.60 | 1.34 | 8E-131 | 9.2E-127 |
| *TFPI2* | 3 | 0.79 | 0.47 | 1.12 | 2.2E-110 | 2.5E-106 |
| *CXCL8* | 3 | 0.87 | 0.60 | 1.02 | 7E-103 | 8E-99 |
| *B2M* | 3 | 0.64 | 0.34 | 0.68 | 2.5E-68 | 2.8E-64 |
| *SERPINE2* | 3 | 0.43 | 0.20 | 0.62 | 5.5E-45 | 6.3E-41 |
| *TAGLN* | 4 | 0.90 | 0.28 | 1.43 | 4.2E-242 | 4.8E-238 |
| *ACTA2* | 4 | 0.47 | 0.09 | 0.70 | 1.5E-133 | 1.7E-129 |
| *LGALS1* | 4 | 0.94 | 0.55 | 0.93 | 2.6E-125 | 3E-121 |
| *TPM1* | 4 | 0.80 | 0.36 | 1.02 | 4.9E-122 | 5.7E-118 |
| *TPM2* | 4 | 0.92 | 0.60 | 1.09 | 7.9E-121 | 9.1E-117 |
| *MYL9* | 4 | 0.57 | 0.18 | 0.59 | 1.4E-95 | 1.6E-91 |
| *TMSB10* | 4 | 0.99 | 0.89 | 0.68 | 7.1E-82 | 8.1E-78 |
| *ACTB* | 4 | 0.86 | 0.56 | 0.79 | 1.5E-77 | 1.8E-73 |
| *MYL6* | 4 | 0.90 | 0.64 | 0.62 | 4E-66 | 4.6E-62 |
| *RAB13* | 6 | 0.87 | 0.28 | 1.88 | 7.6E-144 | 8.8E-140 |
| *ANP32B* | 6 | 0.51 | 0.10 | 0.72 | 2E-96 | 2.3E-92 |
| *CCND1* | 6 | 0.41 | 0.09 | 0.72 | 1.9E-66 | 2.2E-62 |
| *IGFBP5* | 6 | 0.70 | 0.34 | 1.30 | 8E-50 | 9.2E-46 |
| *GAPDH* | 6 | 0.94 | 0.88 | 0.59 | 3.1E-17 | 3.5E-13 |
| *TPM2* | 6 | 0.76 | 0.62 | 0.68 | 4E-16 | 4.6E-12 |
| *LGALS1* | 6 | 0.69 | 0.58 | 0.59 | 1.6E-10 | 1.8E-06 |
| *ACTB* | 6 | 0.70 | 0.58 | 0.59 | 4.6E-10 | 5.3E-06 |
| *TAGLN* | 6 | 0.48 | 0.32 | 0.75 | 5.4E-10 | 6.2E-06 |
| *MALAT1* | 7 | 0.82 | 0.51 | 0.68 | 4.3E-40 | 4.9E-36 |
| *TUBA1B* | 8 | 0.68 | 0.18 | 0.95 | 1.5E-88 | 1.7E-84 |
| *H2AFZ* | 8 | 0.73 | 0.27 | 0.87 | 2.3E-70 | 2.7E-66 |
| *UBE2S* | 8 | 0.50 | 0.12 | 0.66 | 1.2E-67 | 1.4E-63 |
| *LGALS1* | 8 | 0.88 | 0.58 | 0.64 | 2.4E-31 | 2.8E-27 |
| *VIM* | 8 | 0.79 | 0.52 | 0.74 | 2.3E-27 | 2.7E-23 |
| *ACTB* | 8 | 0.79 | 0.58 | 0.62 | 1.2E-19 | 1.4E-15 |
| *PPIB* | 10 | 0.42 | 0.16 | 0.59 | 3.8E-19 | 4.3E-15 |
| *IGFBP7* | 10 | 0.44 | 0.18 | 0.83 | 1.7E-17 | 2E-13 |
| *CD63* | 10 | 0.59 | 0.32 | 0.73 | 3.8E-16 | 4.4E-12 |
| *CXCL8* | 10 | 0.89 | 0.63 | 1.36 | 2.4E-14 | 2.7E-10 |
| *B2M* | 10 | 0.61 | 0.37 | 0.97 | 2.3E-13 | 2.6E-09 |
| *TIMP1* | 10 | 0.84 | 0.63 | 0.82 | 1.3E-12 | 1.5E-08 |
| *TFPI2* | 10 | 0.72 | 0.50 | 0.72 | 3.2E-12 | 3.6E-08 |
| *CXCL5* | 10 | 0.41 | 0.19 | 0.78 | 5.4E-12 | 6.2E-08 |
| *CXCL3* | 10 | 0.45 | 0.24 | 0.76 | 9.4E-10 | 1.1E-05 |
| *NEAT1* | 12 | 0.51 | 0.16 | 0.72 | 1.3E-25 | 1.5E-21 |
| *ITGB1* | 12 | 0.48 | 0.15 | 0.70 | 1.7E-22 | 1.9E-18 |
| *PAPPA* | 12 | 0.36 | 0.11 | 0.75 | 5.4E-18 | 6.2E-14 |
| *IGFBP5* | 12 | 0.65 | 0.35 | 0.70 | 2.6E-14 | 3E-10 |
| *MALAT1* | 12 | 0.70 | 0.52 | 0.93 | 1.1E-09 | 1.3E-05 |
| *KCNQ1OT1* | 14 | 0.35 | 0.01 | 0.74 | 7.4E-186 | 8.5E-182 |
| *N4BP2L2* | 14 | 0.42 | 0.02 | 0.68 | 6.7E-125 | 7.7E-121 |
| *ADAMTS6* | 14 | 0.32 | 0.01 | 0.72 | 3.5E-123 | 4.1E-119 |
| *PNISR* | 14 | 0.41 | 0.02 | 0.74 | 3.6E-116 | 4.2E-112 |
| *WSB1* | 14 | 0.42 | 0.02 | 0.87 | 1.2E-112 | 1.4E-108 |
| *MEG3* | 14 | 0.59 | 0.08 | 1.51 | 1E-72 | 1.2E-68 |
| *SLC25A37* | 14 | 0.36 | 0.03 | 0.77 | 6.8E-64 | 7.8E-60 |
| *NEAT1* | 14 | 0.73 | 0.15 | 4.25 | 4.5E-63 | 5.2E-59 |
| *ITGA1* | 14 | 0.39 | 0.04 | 0.93 | 5E-60 | 5.7E-56 |
| *DDX17* | 14 | 0.37 | 0.04 | 0.65 | 2.1E-54 | 2.4E-50 |
| *VMP1* | 14 | 0.48 | 0.08 | 1.60 | 7.3E-50 | 8.3E-46 |
| *MALAT1* | 14 | 0.91 | 0.52 | 5.12 | 7E-39 | 8E-35 |
| *COL1A1* | 14 | 0.58 | 0.14 | 0.74 | 4.6E-34 | 5.2E-30 |
| *CALD1* | 14 | 0.55 | 0.23 | 1.25 | 1.9E-18 | 2.2E-14 |
| *TPM1* | 14 | 0.67 | 0.40 | 0.62 | 5.4E-09 | 6.2E-05 |
| *ACHE* | 15 | 0.14 | 0.00 | 0.90 | 3.1E-101 | 3.5E-97 |
| *GLCCI1* | 15 | 0.14 | 0.00 | 0.90 | 2E-39 | 2.3E-35 |
| *SMARCD3* | 15 | 0.23 | 0.01 | 0.82 | 5.8E-36 | 6.7E-32 |
| *TSC22D1* | 15 | 0.50 | 0.04 | 1.69 | 1.9E-26 | 2.1E-22 |
| *RFC2* | 15 | 0.18 | 0.01 | 0.62 | 6E-26 | 6.9E-22 |
| *AGAP3* | 15 | 0.23 | 0.02 | 0.61 | 6.5E-15 | 7.4E-11 |
| *BET1* | 15 | 0.36 | 0.04 | 0.81 | 9.8E-15 | 1.1E-10 |
| *TRIP6* | 15 | 0.27 | 0.02 | 0.60 | 1.4E-14 | 1.6E-10 |
| *ARL4A* | 15 | 0.18 | 0.01 | 0.61 | 1.2E-12 | 1.4E-08 |
| *DNAJC2* | 15 | 0.18 | 0.01 | 0.91 | 2.2E-12 | 2.5E-08 |
| *GNAI1* | 15 | 0.27 | 0.04 | 0.81 | 6.7E-09 | 7.6E-05 |
| *TSC22D4* | 15 | 0.18 | 0.02 | 0.84 | 1.6E-08 | 1.8E-04 |
| *AKAP9* | 15 | 0.14 | 0.01 | 1.08 | 1.6E-08 | 1.8E-04 |
| *SNHG15* | 15 | 0.14 | 0.01 | 1.11 | 2.8E-08 | 3.3E-04 |
| *UBE2H* | 15 | 0.23 | 0.03 | 0.78 | 4.2E-07 | 4.8E-03 |
| *WBSCR22* | 15 | 0.18 | 0.02 | 0.83 | 6.2E-07 | 7.1E-03 |
| *RHEB* | 15 | 0.46 | 0.12 | 1.34 | 8E-07 | 9.2E-03 |
| *ZYX* | 15 | 0.23 | 0.04 | 0.91 | 2.5E-06 | 2.8E-02 |
| *CAV1* | 15 | 0.18 | 0.03 | 0.99 | 3.4E-06 | 3.9E-02 |
| *SBDS* | 15 | 0.27 | 0.06 | 0.78 | 4.3E-06 | 4.9E-02 |

**Table S3** DGE analysis results of the Schwann cell differentiation SNAT RNA-seq dataset including the top 5 up- and down-regulated DEGs for each of the 6 stages (k) after stage E13 compared to E13.

| **Stage k vs. Stage E13** | **Gene** | **Log2FC** | **P** | **FDR** |
| --- | --- | --- | --- | --- |
| E17 Up | *MAL* | 6.84 | 6.86E-95 | 1.42E-90 |
| E17 Up | *ART3* | 8.44 | 2.00E-94 | 2.08E-90 |
| E17 Up | *GJC3* | 8.22 | 5.23E-79 | 2.71E-75 |
| E17 Up | *LAMA2* | 7.16 | 3.07E-67 | 7.08E-64 |
| E17 Up | *SBSPON* | 11.07 | 9.40E-63 | 1.63E-59 |
| E17 Down | *MAPT* | -8.30 | 4.04E-84 | 2.79E-80 |
| E17 Down | *INA* | -10.32 | 2.09E-69 | 7.24E-66 |
| E17 Down | *STMN2* | -8.45 | 2.91E-69 | 8.62E-66 |
| E17 Down | *GAP43* | -7.60 | 2.09E-65 | 4.34E-62 |
| E17 Down | *RTN1* | -7.61 | 1.05E-63 | 1.98E-60 |
| P1 Up | *GJC3* | 10.96 | 2.48E-115 | 5.15E-111 |
| P1 Up | *CLDN19* | 12.85 | 1.49E-113 | 1.55E-109 |
| P1 Up | *PMP22* | 8.96 | 2.36E-110 | 1.63E-106 |
| P1 Up | *PMP2* | 13.17 | 2.42E-109 | 1.26E-105 |
| P1 Up | *FABP9* | 13.15 | 2.15E-106 | 8.91E-103 |
| P1 Down | *STMN2* | -9.90 | 6.00E-70 | 6.23E-67 |
| P1 Down | *GAP43* | -9.27 | 6.48E-69 | 6.12E-66 |
| P1 Down | *MAPT* | -7.39 | 7.38E-69 | 6.66E-66 |
| P1 Down | *DPYSL3* | -6.70 | 3.11E-62 | 2.30E-59 |
| P1 Down | *CRMP1* | -11.78 | 8.43E-62 | 5.75E-59 |
| P5 Up | *PMP22* | 11.53 | 8.87E-209 | 1.84E-204 |
| P5 Up | *MBP* | 12.53 | 1.73E-171 | 1.80E-167 |
| P5 Up | *PMP2* | 15.02 | 6.84E-158 | 4.73E-154 |
| P5 Up | *CLDN19* | 13.74 | 1.44E-152 | 7.48E-149 |
| P5 Up | *FABP9* | 14.99 | 7.22E-152 | 3.00E-148 |
| P5 Down | *STMN2* | -10.12 | 1.96E-73 | 1.23E-70 |
| P5 Down | *GAP43* | -9.66 | 1.09E-71 | 6.44E-69 |
| P5 Down | *DPYSL3* | -7.07 | 2.56E-71 | 1.43E-68 |
| P5 Down | *INA* | -11.51 | 4.25E-64 | 1.88E-61 |
| P5 Down | *CRMP1* | -13.45 | 7.73E-61 | 2.97E-58 |
| P14 Up | *PMP22* | 12.84 | 1.34E-239 | 2.77E-235 |
| P14 Up | *MBP* | 13.79 | 7.41E-187 | 7.69E-183 |
| P14 Up | *MAL* | 10.44 | 4.76E-177 | 3.29E-173 |
| P14 Up | *PMP2* | 15.41 | 2.11E-169 | 1.09E-165 |
| P14 Up | *FABP9* | 15.39 | 1.32E-162 | 5.49E-159 |
| P14 Down | *GAP43* | -9.38 | 2.39E-69 | 8.56E-67 |
| P14 Down | *STMN2* | -9.36 | 5.84E-69 | 2.04E-66 |
| P14 Down | *INA* | -13.07 | 1.19E-63 | 3.21E-61 |
| P14 Down | *BASP1* | -10.25 | 4.51E-63 | 1.14E-60 |
| P14 Down | *DPYSL3* | -6.31 | 1.22E-60 | 2.85E-58 |
| P24 Up | *PMP22* | 12.93 | 5.98E-201 | 1.24E-196 |
| P24 Up | *MBP* | 13.38 | 3.01E-173 | 3.12E-169 |
| P24 Up | *PMP2* | 15.66 | 7.27E-150 | 5.03E-146 |
| P24 Up | *PRX* | 12.00 | 2.38E-149 | 1.24E-145 |
| P24 Up | *FABP9* | 15.63 | 1.24E-143 | 5.16E-140 |
| P24 Down | *GAP43* | -9.38 | 1.71E-68 | 6.69E-66 |
| P24 Down | *INA* | -14.66 | 5.67E-65 | 1.93E-62 |
| P24 Down | *BASP1* | -9.92 | 4.82E-62 | 1.49E-59 |
| P24 Down | *MEST* | -6.56 | 7.22E-61 | 2.14E-58 |
| P24 Down | *CRMP1* | -14.53 | 3.92E-60 | 1.13E-57 |
| P60 Up | *PMP22* | 12.03 | 6.44E-205 | 1.34E-200 |
| P60 Up | *APOD* | 11.84 | 9.53E-186 | 9.89E-182 |
| P60 Up | *CNTF* | 14.44 | 9.13E-173 | 6.31E-169 |
| P60 Up | *MBP* | 12.50 | 1.71E-157 | 5.93E-154 |
| P60 Up | *DRP2* | 10.64 | 3.58E-156 | 1.06E-152 |
| P60 Down | *MEST* | -10.27 | 1.21E-98 | 8.67E-96 |
| P60 Down | *INA* | -14.05 | 8.93E-68 | 2.52E-65 |
| P60 Down | *BASP1* | -10.80 | 4.56E-67 | 1.23E-64 |
| P60 Down | *GAP43* | -8.43 | 8.41E-67 | 2.21E-64 |
| P60 Down | *DPYSL3* | -6.96 | 6.41E-64 | 1.53E-61 |

**Table S4** Table of the modules that changed significantly in relation to developmental stage in the SNAT dataset evaluated by ANOVA. The number of genes in the module, ANOVA P, and most significant GO term are listed for each module. Modules with no significant GO terms are left blank.

| **Module** | **Genes** | **P** | **Top GO term** | **File** |
| --- | --- | --- | --- | --- |
| Black | 305 | 3.39E-16 | Small GTPase binding | File S14 |
| Blue | 2263 | 3.11E-11 | Positive regulation of DNA metabolic process | File S15 |
| Brown | 2097 | 4.36E-6 | Regulation of neuron projection development | File S16 |
| Green | 773 | 7.38E-5 | NADP metabolic process | File S17 |
| Grey | 8 | 4.82E-8 | Proteasome-mediated ubiquitin-dependent protein catabolic process | File S18 |
| Purple | 132 | 5.31E-7 | Purine-containing compound biosynthetic process | File S19 |
| Tan | 92 | 3.49E-10 | Phagocytic cup | File S20 |
| Turquoise | 4473 | 1.61E-10 | Regulation of protein stability | File S21 |
| Yellow | 1246 | 2.10E-22 | Mitochondrial matrix | File S22 |

**Table S5** DGE analysis results of the mSC and nmSC SNAT RNA-seq dataset including the top 10 up- and down-regulated DEGs in mSCs versus nmSCs from the SNAT RNA-seq dataset.

| **Gene** | **Log2FC** | **P** | **FDR** |
| --- | --- | --- | --- |
| *CAV1* | 8.18 | 1.14E-92 | 1.46E-88 |
| *PMP22* | 5.06 | 2.99E-88 | 1.92E-84 |
| *MBP* | 4.48 | 3.72E-83 | 1.59E-79 |
| *OGN* | 5.73 | 8.09E-80 | 2.59E-76 |
| *PMP2* | 6.57 | 8.89E-78 | 2.28E-74 |
| *FABP9* | 6.57 | 5.10E-75 | 1.09E-71 |
| *KCNK1* | 6.19 | 1.64E-72 | 3.01E-69 |
| *HMGCS1* | 4.67 | 1.72E-68 | 2.76E-65 |
| *CNTF* | 8.20 | 3.32E-63 | 4.73E-60 |
| *HLA-DMB* | 7.56 | 1.71E-62 | 2.19E-59 |
| *SPARCL1* | -5.50 | 4.07E-58 | 3.48E-55 |
| *ENTPD2* | -6.21 | 1.17E-55 | 7.91E-53 |
| *EDNRB* | -4.13 | 2.47E-53 | 1.44E-50 |
| *TOP2A* | -5.22 | 2.05E-52 | 1.10E-49 |
| *SMIM5* | -6.69 | 3.69E-52 | 1.89E-49 |
| *POSTN* | -5.01 | 9.13E-52 | 4.19E-49 |
| *NCAM1* | -5.16 | 1.82E-51 | 8.05E-49 |
| *SLC43A3* | -6.03 | 3.43E-51 | 1.47E-48 |
| *S1PR3* | -6.36 | 5.58E-49 | 2.31E-46 |
| *L1CAM* | -6.15 | 1.87E-48 | 7.27E-46 |

**Table S6** Differentially expressed genes comparingiSC vs nmSC and iSC vs mSC in the SNAT dataset.

| **Cluster vs iSC** | **Gene** | **Proportion**  **cluster > 0** | **Proportion**  **other clusters >0** | **Log2FC** | **P** | **FDR** |
| --- | --- | --- | --- | --- | --- | --- |
| mSC Up | *NCMAP* | 0.96 | 0.18 | 2.36 | 3.91E-245 | 6.14E-241 |
| mSC Up | *MPZ* | 1.00 | 0.99 | 0.72 | 6.62E-227 | 1.04E-222 |
| mSC Up | *EMID1* | 0.92 | 0.17 | 1.96 | 2.48E-218 | 3.90E-214 |
| mSC Up | *PLLP* | 1.00 | 0.65 | 1.05 | 3.71E-212 | 5.83E-208 |
| mSC Up | *FXYD6* | 0.93 | 0.22 | 1.84 | 7.08E-212 | 1.11E-207 |
| mSC Up | *SLC36A2* | 0.88 | 0.09 | 2.06 | 3.76E-209 | 5.90E-205 |
| mSC Up | *PRX* | 0.99 | 0.78 | 0.81 | 8.18E-207 | 1.28E-202 |
| mSC Up | *FA2H* | 0.96 | 0.27 | 1.56 | 2.50E-206 | 3.92E-202 |
| mSC Up | *CLDN19* | 0.99 | 0.48 | 1.24 | 1.86E-194 | 2.91E-190 |
| mSC Up | *CDKN1A* | 0.98 | 0.57 | 1.11 | 8.05E-193 | 1.26E-188 |
| mSC Down | *EDNRB* | 0.87 | 1.00 | -1.19 | 1.38E-203 | 2.16E-199 |
| mSC Down | *SPARCL1* | 0.59 | 0.96 | -1.34 | 5.24E-178 | 8.22E-174 |
| mSC Down | *COL3A1* | 0.92 | 1.00 | -0.90 | 8.02E-164 | 1.26E-159 |
| mSC Down | *NCAM1* | 0.51 | 0.95 | -1.27 | 1.79E-159 | 2.80E-155 |
| mSC Down | *SOSTDC1* | 0.94 | 0.98 | -0.70 | 2.53E-155 | 3.98E-151 |
| mSC Down | *POSTN* | 0.37 | 0.85 | -1.51 | 2.66E-153 | 4.17E-149 |
| mSC Down | *MARCKS* | 0.92 | 1.00 | -0.67 | 1.18E-150 | 1.85E-146 |
| mSC Down | *CDK6* | 0.60 | 0.91 | -1.17 | 4.10E-140 | 6.44E-136 |
| mSC Down | *RARRES2* | 0.64 | 0.89 | -1.13 | 1.11E-133 | 1.74E-129 |
| mSC Down | *LRRC61* | 0.55 | 0.88 | -1.09 | 1.38E-131 | 2.17E-127 |
| nmSC Up | *PRNP* | 0.98 | 0.81 | 0.69 | 9.16E-138 | 1.44E-133 |
| nmSC Up | *SCN7A* | 0.89 | 0.44 | 1.15 | 1.61E-119 | 2.52E-115 |
| nmSC Up | *PRND* | 0.90 | 0.61 | 0.90 | 1.64E-112 | 2.57E-108 |
| nmSC Up | *SERPING1* | 0.75 | 0.19 | 1.44 | 1.90E-112 | 2.99E-108 |
| nmSC Up | *GPR37L1* | 0.79 | 0.24 | 1.31 | 4.24E-112 | 6.66E-108 |
| nmSC Up | *FXYD1* | 0.98 | 0.84 | 0.64 | 1.41E-111 | 2.21E-107 |
| nmSC Up | *ENTPD2* | 0.91 | 0.59 | 0.85 | 3.08E-107 | 4.84E-103 |
| nmSC Up | *HLA-E* | 0.83 | 0.32 | 1.21 | 5.46E-105 | 8.58E-101 |
| nmSC Up | *CPE* | 0.96 | 0.66 | 0.77 | 2.81E-101 | 4.41E-97 |
| nmSC Up | *RASSF4* | 0.67 | 0.13 | 1.40 | 2.84E-100 | 4.45E-96 |
| nmSC Down | *DYNLT1* | 0.83 | 0.98 | -0.70 | 7.57E-134 | 1.19E-129 |
| nmSC Down | *EDNRB* | 0.95 | 1.00 | -0.73 | 4.98E-131 | 7.82E-127 |
| nmSC Down | *ID2* | 0.89 | 0.98 | -0.82 | 1.31E-102 | 2.05E-98 |
| nmSC Down | *DYNLT1* | 0.81 | 0.96 | -0.66 | 5.92E-102 | 9.29E-98 |
| nmSC Down | *DYNLT1* | 0.85 | 0.97 | -0.61 | 5.11E-94 | 8.03E-90 |
| nmSC Down | *POSTN* | 0.60 | 0.85 | -0.99 | 2.58E-72 | 4.06E-68 |
| nmSC Down | *HNRNPA1* | 0.69 | 0.95 | -0.73 | 5.28E-69 | 8.29E-65 |
| nmSC Down | *RBM3* | 0.71 | 0.91 | -0.67 | 5.24E-66 | 8.23E-62 |
| nmSC Down | *ERH* | 0.78 | 0.95 | -0.60 | 1.05E-65 | 1.65E-61 |
| nmSC Down | *SERPINE2* | 0.78 | 0.88 | -0.90 | 9.23E-61 | 1.45E-56 |

**Table S7** Markers genes for SNAT scRNAseq dataset clusters.

| **Gene** | **Cluster** | **Proportion**  **cluster > 0** | **Proportion**  **other clusters >0** | **Log2FC** | **P** | **FDR** |
| --- | --- | --- | --- | --- | --- | --- |
| *NCMAP* | mSC cluster 2 | 0.99 | 0.51 | 1.36 | 5.56E-157 | 8.74E-153 |
| *SLC36A2* | mSC cluster 2 | 0.92 | 0.38 | 1.26 | 1.29E-128 | 2.03E-124 |
| *FAM178B* | mSC cluster 2 | 0.79 | 0.28 | 1.31 | 4.81E-113 | 7.55E-109 |
| *ECSCR* | mSC cluster 1 | 0.85 | 0.19 | 1.45 | 1.77E-149 | 2.77E-145 |
| *PMP2* | mSC cluster 1 | 0.93 | 0.34 | 1.70 | 1.34E-143 | 2.10E-139 |
| *FABP9* | mSC cluster 1 | 0.92 | 0.33 | 1.69 | 1.64E-143 | 2.57E-139 |
| *MFAP5* | mSC cluster 3 | 1.00 | 0.10 | 2.48 | 2.20E-158 | 3.46E-154 |
| *APOD* | mSC cluster 3 | 0.99 | 0.12 | 2.29 | 2.43E-136 | 3.81E-132 |
| *SPP1* | mSC cluster 3 | 0.89 | 0.10 | 2.26 | 3.41E-124 | 5.36E-120 |
| *C4A* | nm(R)SC | 0.69 | 0.09 | 1.70 | 3.53E-206 | 5.54E-202 |
| *ALDH1A1* | nm(R)SC | 0.65 | 0.08 | 1.70 | 2.20E-200 | 3.45E-196 |
| *F3* | nm(R)SC | 0.65 | 0.09 | 1.66 | 1.17E-182 | 1.83E-178 |
| *CDCA3* | prol. SC | 0.88 | 0.08 | 2.13 | 9.87E-245 | 1.55E-240 |
| *BIRC5* | prol. SC | 0.97 | 0.14 | 2.29 | 3.99E-223 | 6.27E-219 |
| *CDK1* | prol. SC | 0.87 | 0.16 | 2.17 | 3.47E-165 | 5.44E-161 |
| *POSTN* | iSC | 0.85 | 0.51 | 1.04 | 3.10E-116 | 4.87E-112 |
| *SMIM5* | iSC | 0.48 | 0.24 | 0.94 | 1.02E-47 | 1.60E-43 |
| CCND2 | iSC | 0.58 | 0.36 | 0.89 | 7.06E-45 | 1.11E-40 |
| CDKN1C | pmSC | 0.96 | 0.51 | 1.46 | 7.81E-113 | 1.23E-108 |
| *CSRP2* | pmSC | 0.99 | 0.59 | 1.02 | 2.91E-77 | 4.58E-73 |
| *LPCAT1* | pmSC | 0.92 | 0.55 | 1.00 | 2.10E-74 | 3.30E-70 |
| *ENTPD2* | tSC | 0.97 | 0.53 | 1.19 | 5.28E-125 | 8.29E-121 |
| *CLDN11* | tSC | 0.66 | 0.14 | 1.14 | 8.61E-117 | 1.35E-112 |
| *ID3* | tSC | 0.77 | 0.31 | 1.20 | 2.69E-83 | 4.22E-79 |

**Table S8** Sequence of primers used in qRT-PCR analysis

|  | | |
| --- | --- | --- |
| **Genes** | **Forward (5' - 3')** | **Reverse (5' - 3')** |
| *NANOG* | CTCAGCCTCCAGCAGATGC | TAGATTTCATTCTCTGGTTCTGG |
| *SOX2* | AGTCTCCAAGCGACGAAAAA | GCAAGAAGCCTCTCCTTGAA |
| *SOX17* | GTGGACCGCACGGAATTTG | GGAGATTCACACCGGAGTCA |
| *SOX10* | CCTCACAGATCGCCTACACC | CATATAGGAGAAGGCCGAGTAGA |
| *MPZ* | AAGTGCCAACTAGGTACGGG | CATAGCACTGAGCCTCCTCT |
| *SLUG* | CGAACTGGACACACATACAGTG | CTGAGGATCTCTGGTTGTGGT |
| *GAP43* | GGCCGCAACCAAAATTCAGG | CGGCAGTAGTGGTGCCTTC |
| *NGFR* | TGGCCTACATAGCCTTCAAGA | GAGATGCCACTGTCGCTGT |
| *S100β* | GACCCTCATCAACGTGTTCCA | CCACAAGCACCACATACTCCT |
| *GFAP* | AGGTCCATGTGGAGCTTGAC | GCCATTGCCTCATACTGCGT |
| *CDH19* | ACAAGCGTCTGTAACTCTGGG | AGCAAACTTCGTGTTGGACA |
| *PMP22* | GATCCTGTCGATCATCTTCAGC | AGCACTCATCACGCACAGAC |
| *PAX3* | AGCTCGGCGGTGTTTTTATCA | CTGCACAGGATCTTGGAGACG |
| *ADAMTS6* | TTTGAGCCTCATCATGGCTTC | AGGGTCCATACTCCGTCTTCT |
| *ANXA1* | GCGGTGAGCCCCTATCCTA | TGATGGTTGCTTCATCCACAC |
| *CAV1* | GCGACCCTAAACACCTCAAC | ATGCCGTCAAAACTGTGTGTC |
| *CAV2* | AAGACCTGCCTAATGGTTCTGC | CTCGTACACAATGGAGCAATGAT |
| *COL1A1* | GAGGGCCAAGACGAAGACATC | CAGATCACGTCATCGCACAAC |
| *COL3A1* | GGAGCTGGCTACTTCTCGC | GGGAACATCCTCCTTCAACAG |
| *LOX* | CGGCGGAGGAAAACTGTCT | TCGGCTGGGTAAGAAATCTGA |
| *SPP1* | CTCCATTGACTCGAACGACTC | CAGGTCTGCGAAACTTCTTAGAT |
| *ITGA1* | GCTCCTCACTGTTGTTCTACG | CGGGCCGCTGAAAGTCATT |
| *POSTN* | CTCATAGTCGTATCAGGGGTCG | ACACAGTCGTTTTCTGTCCAC |
| *GAPDH* | CCTCAACGACCACTTTGTCA | CCCTGTTGCTGTAGCCAAAT |

**SUPPLEMENTAL FIGURES**

**Fig. S1** Characterization of hiPSC 101.J line. Immunostaining shows expression of pluripotency markers SOX2 (red), SSEA4 (green) **(A)**, NANOG (red), TRA-1-60 (green) **(B),** and OCT4 (red) **(C)** in hiPSC IBRI.101.J. DAPI (blue) was used to stain the cell nuclei. Scale bars are 50 µm. **D)** The hiPSC line IBRI.101.J proceeded with embryoid body formation and then differentiated in a monolayer to precursors of mesoderm, endoderm and ectoderm, and stained with specific antibodies: Vimentin, SOX17 and βIII-tubulin. DAPI (blue) was used to stain the cell nuclei. Scale bars are 50 µm.

**Fig. S2** The mRNA expression of pluripotency markers including *NANOG* **(A)**and *SOX2* **(B)** were assessed by qRT-PCR in 101.J hiPSCs, SCPs and SCs. SCP and mature SC markers including *SOX17* **(C)**, *SOX10* **(D)**, *MPZ* **(E)**, *NGFR* **(F)**, *GAP43* **(G)**, *SLUG* **(H)**, *S100b* **(I)**, *GFAP* **(J),** *CDH19* **(K)**, *PMP22* **(L)**, and *PAX3* **(M)** were also assessed across the hiPSC to SC continuum. Significance levels are: P>0.10 (n.s.), P<0.10 (•), P<0.05 (*), P<0.01 (**), and P<0.001 (***).

**Fig. S3** Characterization of hiPSC derived SCPs and SCs by flow cytometry. Flow cytometry was performed with isotype control to establish background fluorescence **(A, D).** Histograms show the percentage of SOX10- **(B)** and GAP43-positive SCPs **(C)** and S100β-positive SCs **(E)** differentiated from the hiPSCs 101.J line.


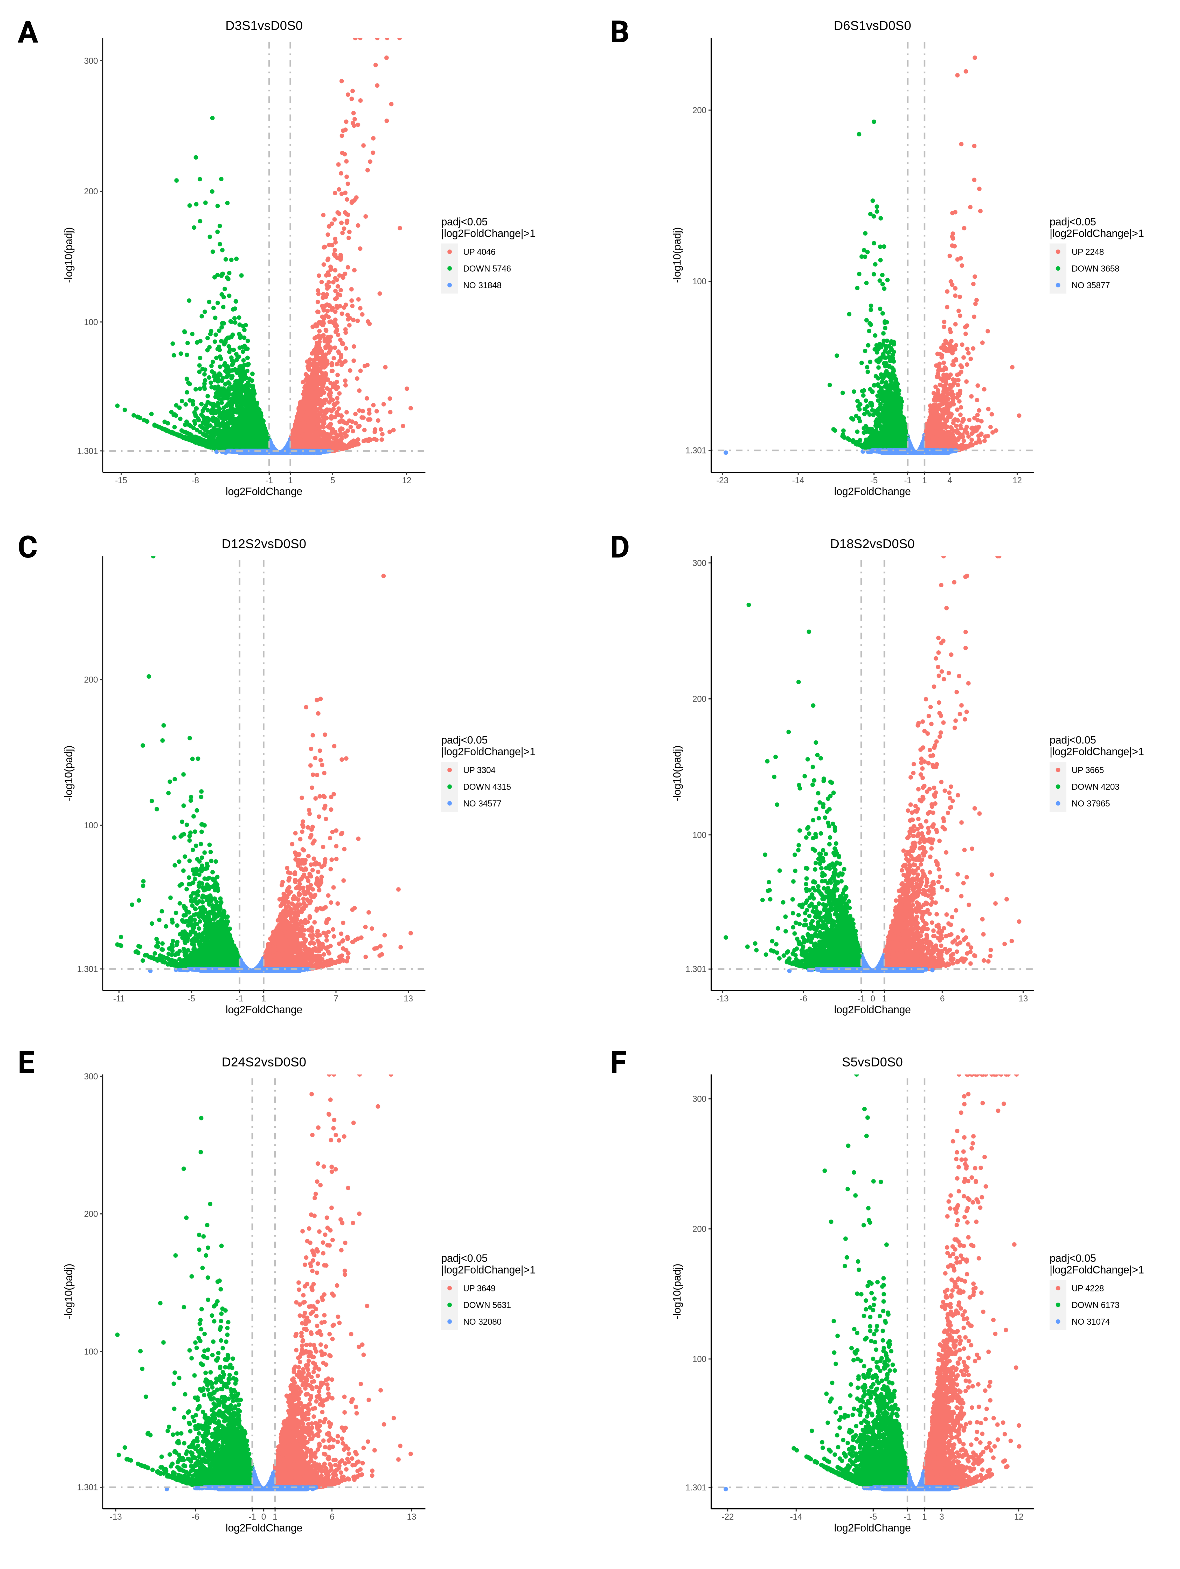


**Fig. S4** Volcano plots showing DEGs from SCLCs-SUMC scRNA-seq analysis. DEGs are shown for D3S1 **(A)**, D6S1 **(B)**, D12S2 **(C)**, D18S2 **(D)**, D24S2 **(E)**, and S5 **(F)** vs D0S0.

**Fig. S5** The number of DEGs for each timepoint, i.e., Day 3: D3, Day 6: D6 (NR), Day 12: D12, Day 18: D18, Day 24: D24 (SCP), Day 31: D31 (SC stage), comparison vs. Day 0 (D0), i.e., hiPSC. Type denotes whether the DEG was up-regulated (up), down-regulated (down), or either (all).

**Fig. S6** Heatmap of gene correlations from SC-IU WGCNA analysis. Gene co-expression modules are shown in the color-coded annotation tracks to the left and above the heatmap.

**Fig. S7** SC-IUred module results. **(A)** Module eigengene values are plotted over hiPSC differentiation timepoints. **(B)** Functional enrichment analysis reveals significantly enriched ontology terms.

**Fig. S8** SC-IUturquoise module results. **(A)** Module eigengene values are plotted over hiPSC differentiation timepoints. **(B)** Functional enrichment analysis reveals significantly enriched ontology terms.

**Fig. S9** SC-IUcyan module results. Module eigengene values are plotted over hiPSC differentiation timepoints. Functional enrichment analysis did not reveal significantly enriched ontology terms.

**Fig. S10** SC-IUblack module results. **(A)** Module eigengene values are plotted over hiPSC differentiation timepoints. **(B)** Functional enrichment analysis reveals significantly enriched ontology terms.

**Fig. S11** SC-IUmagenta module results. **(A)** Module eigengene values are plotted over hiPSC differentiation timepoints. **(B)** Functional enrichment analysis reveals significantly enriched ontology terms.

**Fig. S12** SC-IU **y**ellow module results. **(A)** Module eigengene values are plotted over hiPSC differentiation timepoints. **(B)** Functional enrichment analysis reveals significantly enriched ontology terms.

**Fig. S13** SC-IUmidnightblue module results. **(A)** Module eigengene values are plotted over hiPSC differentiation timepoints. **(B)** Functional enrichment analysis reveals significantly enriched ontology terms.

**Fig. S14** SC-IUgreenyellow module results. **(A)** Module eigengene values are plotted over hiPSC differentiation timepoints. **(B)** Functional enrichment analysis reveals significantly enriched ontology terms.

**Fig. S15** Heatmap of gene correlations from SNAT WGCNA analysis. Gene co-expression modules are shown in the color-coded annotation tracks to the left and above the heatmap.

**Fig. S16** SNAT black module results. **(A)** Module eigengene are plotted over the course of developmental stages. **(B)** Functional enrichment analysis reveals significantly enriched ontology terms.

**Fig. S17** SNAT blue module results. **(A)** Module eigengene are plotted over the course of developmental stages. **(B)** Functional enrichment analysis reveals significantly enriched ontology terms.

**Fig. S18** SNAT brown module results. **(A)** Module eigengene are plotted over the course of developmental stages. **(B)** Functional enrichment analysis reveals significantly enriched ontology terms.

**Fig. S19** SNAT green module results. **(A)** Module eigengene are plotted over the course of developmental stages. **(B)** Functional enrichment analysis reveals significantly enriched ontology terms.

**Fig. S20** SNAT grey module results. **(A)** Module eigengene are plotted over the course of developmental stages. **(B)** Functional enrichment analysis reveals significantly enriched ontology terms.

**Fig. S21** SNAT purple module results. **(A)** Module eigengene are plotted over the course of developmental stages. **(B)** Functional enrichment analysis reveals significantly enriched ontology terms.

**Fig. S22** SNAT tan module results. **(A)** Module eigengene are plotted over the course of developmental stages. **(B)** Functional enrichment analysis reveals significantly enriched ontology terms.

**Fig. S23** SNAT turquoise module results. **(A)** Module eigengene are plotted over the course of developmental stages. **(B)** Functional enrichment analysis reveals significantly enriched ontology terms.

**Fig. S24** SNAT yellow module results. **(A)** Module eigengene are plotted over the course of developmental stages. **(B)** Functional enrichment analysis reveals significantly enriched ontology terms.

**Fig. S25** Correlation between uncorrected SC-IU and SNAT DEGs **(A)** JI matrix of SC-IU up-regulated DEGs and SNAT up-regulated DEGs with comparison of JI matrix diagonal to non-diagonal **(B)**, (**C)** JI matrix of SC-IU down-regulated DEGs and SNAT down-regulated DEGs with comparison of JI matrix diagonal to non-diagonal **(D)**, (**E)** Normalized JI matrix of averaged SC-IU up/down-regulated DEGs and SNAT up/down-regulated DEGs with comparison of JI matrix diagonal to non-diagonal **(F)**. Significance levels are: P>0.10 (n.s.), P<0.10 (•), P<0.05 (*), P<0.01 (**), and P<0.001 (***).

**Fig. S26** mRNA expression of select ECM associated genes including *ADAMTS6* **(A)**, *ANXA1* **(B)**, *CAV1* **(C)**, *CAV2* **(D)**, *COL1A1* **(E)**, *COL3A1* **(F)**, *LOX* **(G)**, *SPP1* **(H])**, *ITGA1* **(I)**, and *POSTN* **(J)** was assessed in 101.J hiPSCs, SCPs, and SCs by qRT-PCR. Significance levels are: P>0.10 (n.s.), P<0.10 (•), P<0.05 (*), P<0.01 (**), and P<0.001 (***).

**Fig. S27** mRNA expression of SC marker genes including *SOX10* **(A)**, *SLUG* **(B)**, *GAP43* **(C),** *NGFR* **(D)**, *PAX3* **(E)**, *CDH119* **(F)**, *S100β* **(G)**, *GFAP* **(H)**, *MPZ* **(I)**, and *PMP22* **(J)** was quantified by qRT-PCR in SCPs derived from WT 101.J iPSCs and CRISPR edited *NF2* KO clones (#35, 36b and 48). Significance levels are: P>0.10 (n.s.), P<0.10 (•), P<0.05 (*), P<0.01 (**), and P<0.001 (***).

**Fig. S28** mRNA expression of key ECM associated genes including *ADAMTS6* **(A)**, *ANXA1* **(B)**, *CAV1* **(C)**, *CAV2* **(D)**, *COL1A1* **(E)**, *COL3A1* **(F)**, *LOX* **(G)**, *SPP1* **(H)**, *ITGA1* **(I)**, and *POSTN* **(J)** was quantified by qRT-PCR in SCPs derived from WT 101.J iPSCs and CRISPR-Cas9 edited *NF2* KO clones (#35, 36b and 48). Significance levels are: P>0.10 (n.s.), P<0.10 (•), P<0.05 (*), P<0.01 (**), and P<0.001 (***).

**Fig. S29** Full Gel electrophoresis images for **A)** NF2 and **B)** Actin.
